# Supplementary material for: Ferroptosis-related lncRNA NRAV affects the prognosis of hepatocellular carcinoma via the miR-375-3P/SLC7A11 axis
Source: Springer Nature journal article supplement (doi:10.1186/s12885-024-12265-y), 2024-04-18
Supplement: MOESM1 [file 26994812]

**Table S1.** The clinical information of patients in the TCGA dataset.

| <b>Variable</b>         | <b>Number of samples</b> |
|-------------------------|--------------------------|
| <b>Gender</b>           |                          |
| Male/Female             | 255/122                  |
| <b>Age at diagnosis</b> |                          |
| ≤65/>65/NA              | 235/141/1                |
| <b>Grade</b>            |                          |
| G1/G2/G3/G4/NA          | 55/180/124/13/5          |
| <b>Stage</b>            |                          |
| I/II/III/IV/NA          | 175/87/86/5/24           |
| <b>T</b>                |                          |
| T1/T2/T3/T4/NA          | 185/95/81/13/3           |
| <b>M</b>                |                          |
| M0/M1/NA                | 257/4/101                |
| <b>N</b>                |                          |
| N0/N1/N2/N3/NA          | 172/67/167/8/116         |
