# Supplementary material for: Ferroptosis-related lncRNA NRAV affects the prognosis of hepatocellular carcinoma via the miR-375-3P/SLC7A11 axis
Source: Springer Nature journal article supplement (doi:10.1186/s12885-024-12265-y), 2024-04-18

fig4D

NRAV

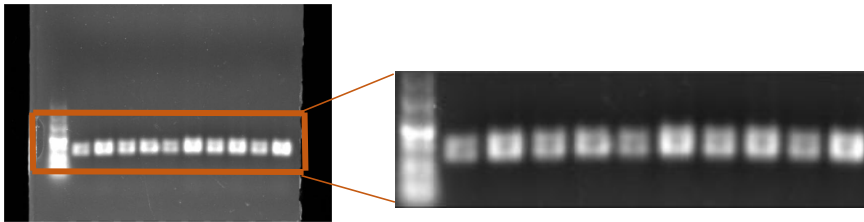

GAPDH

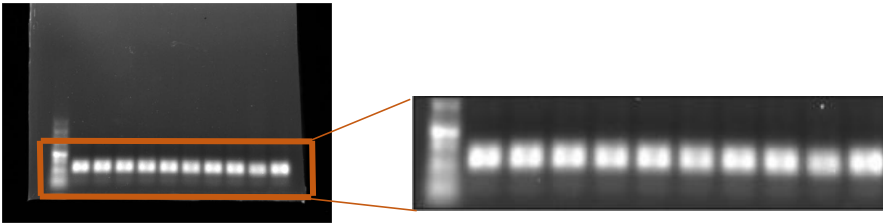

fig4E

NRAV

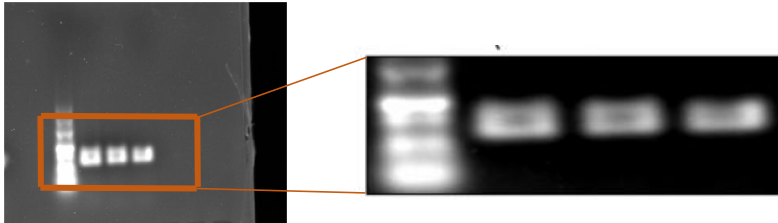

GAPDH

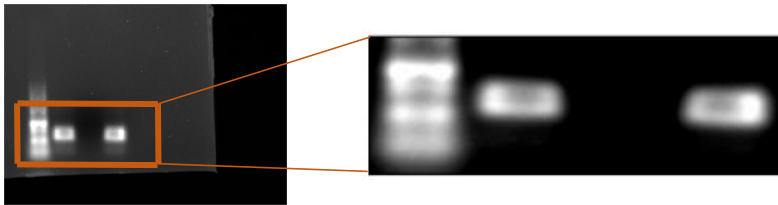

U6

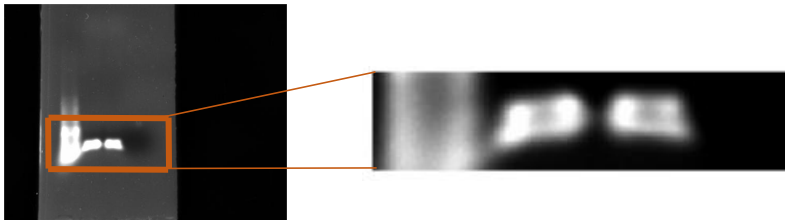

fig4F

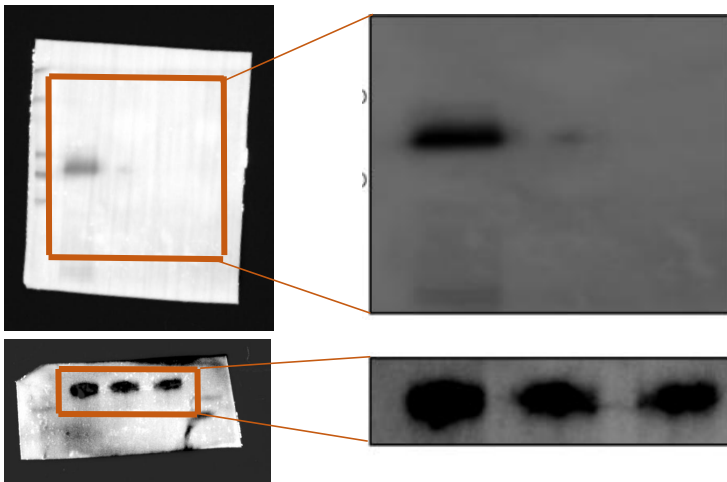

Supplement: MOESM4 [file 26994812]
